# Supplementary material for: Yb-doped SnO2 electron transfer layer assisting the fabrication of high-efficiency and stable perovskite solar cells in air
Source: Royal Society of Chemistry journal article supplement (doi:10.1039/d2ra01297a), 2022-01-01
Supplement: d2ra01297a1.pdf [file d2ra01297a1.pdf]

## Supporting Information

### **Yb-Doped SnO<sub>2</sub> Electron Transfer Layer Assisting the Fabrication of High-Efficiency and Stable Perovskite Solar Cells in Air**

Dixin Liu,<sup>a,‡</sup> WenYuan Zhang,<sup>a,‡</sup> Xin Li<sup>a,\*</sup>, Ziqiu Ren<sup>b,\*</sup>

*<sup>a</sup>MIIT Key Laboratory of Critical Materials Technology for New Energy Conversion and Storage, School of Chemistry and Chemical Engineering, State Key Lab of Urban Water Resource and Environment, Harbin Institute of Technology, 150001 Harbin, China*

*<sup>b</sup> Henan Institute of Advanced Technology, Zhengzhou University, Zhengzhou 450052, P.R. China*

*<sup>‡</sup>These authors contributed equally to this work.*

*\*Corresponding author: Xin Li, Ziqiu Ren*

*E-mail address: lixin@hit.edu.cn (X. Li), renziqiu@hit.edu.cn (Z. Ren)*

**Table S1** Work function of SnO<sub>2</sub> and Yb-doped SnO<sub>2</sub> film

|                                 | SnO <sub>2</sub> | Yb-doped SnO <sub>2</sub> | HOPG <sup>a</sup> |
|---------------------------------|------------------|---------------------------|-------------------|
| Surface potential (mV)          | -370.21          | -477.69                   | 1.040             |
| $\Delta$ SP <sup>b</sup> (mV)   | -369.17          | -476.56                   | /                 |
| Work Function <sup>c</sup> (eV) | 4.28             | 4.17                      | 4.65              |

<sup>a</sup> HOPG (highly oriented pyrolytic graphite) was used as a reference work function of 4.65eV given by supplier;

<sup>b</sup>  $\Delta$ SP = SP(samples)-SP(HOPG);

<sup>c</sup> Work Function =  $e\Delta$ SP + 4.65eV.

**Table S2** Device performance of SnO<sub>2</sub> and Yb-doped SnO<sub>2</sub> perovskite solar cells. The parameters are obtained from the average of 30 devices.

| Type                             | $J_{sc}$<br>(mA cm <sup>-2</sup> ) | $V_{oc}$<br>(V) | FF<br>(%)  | PCE<br>(%) |
|----------------------------------|------------------------------------|-----------------|------------|------------|
| SnO <sub>2</sub> device          | 19.12±1.49                         | 0.98±0.04       | 67.14±4.48 | 12.63±0.91 |
| Yb-doped SnO <sub>2</sub> device | 20.24±0.70                         | 1.01±0.02       | 72.60±2.51 | 14.92±0.50 |

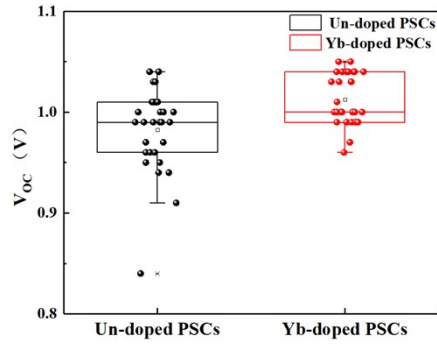

**Fig. S1.**  $V_{oc}$  histograms of PSCs

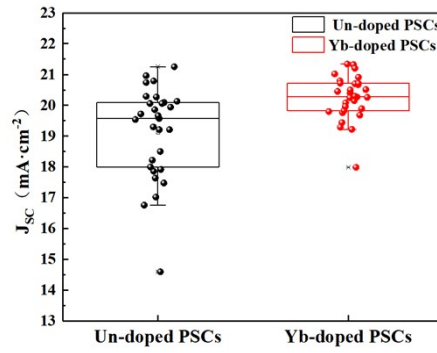

**Fig. S2.**  $J_{sc}$  histograms of PSCs

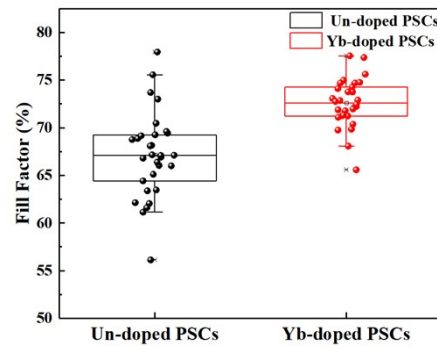

**Fig. S3.** Fill factor histograms of PSCs

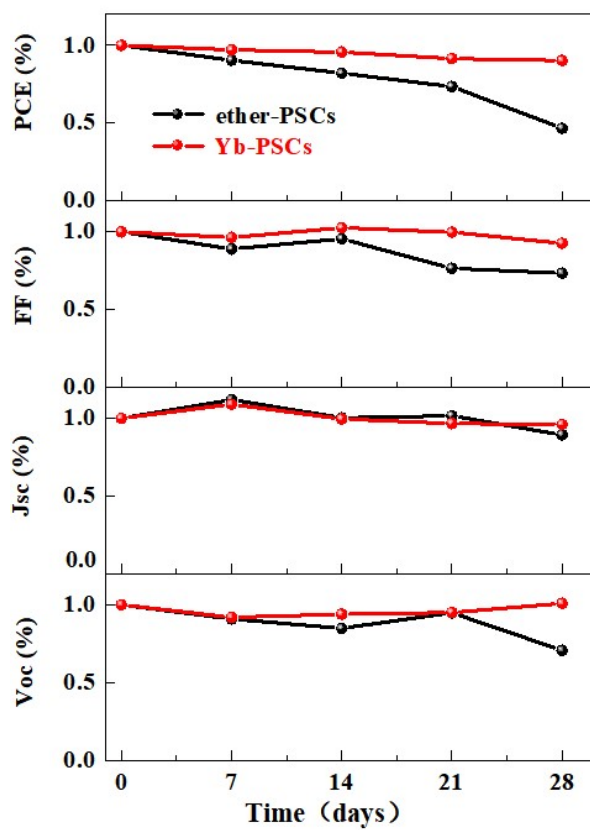

Fig. S4. Long term stability tests of control and optimized devices.
